# Supplementary material for: Increased Amygdala Activations during the Emotional Experience of Death-Related Pictures in Complicated Grief: An fMRI Study
Source: PubMed Central journal article supplement (PMC7141501; doi:10.3390/jcm9030851), 2020-03-20
Supplement: jcm-09-00851-s001.pdf [file jcm-09-00851-s001.pdf]

## Supplementary Material

**Table S1.** Means and standard deviations for 45 emotional pictures used in the fMRI task.

| Category         | Picture code                                                                              | Valence<br>M (SD) | Arousal<br>M (SD) | Dominance<br>M (SD) |
|------------------|-------------------------------------------------------------------------------------------|-------------------|-------------------|---------------------|
| Death            | Graveyard (x8); Cadaver (x2); Terminal disease (x3); Accident (x2)                        | 2.27(0.37)        | 5.56 (0.60)       | 5.52 (0.44)         |
| Negative Valence | 2682; 2692; 2722; 2751; 2752; 3180; 6010; 6821; 9041; 9080; 9120; 9290; 9415; 9530; 9560; | 2.47(0.48)        | 5.61 (0.91)       | 3.41 (0.82)         |
| Positive Valence | 1463; 2010; 2299; 2346; 2360; 4614; 4622; 5260; 7220; 7502; 8190; 8380; 8461; 8496; 8600  | 7.68(0.42)        | 5.04 (0.91)       | 5.78 (0.64)         |

Note: M = Mean, SD = Standard Deviation.

### *Neuroimaging within group results*

#### *Death pictures > fixation cross*

In the contrast of death pictures with the fixation cross, both groups showed bilateral activation in the occipital cortex, intraparietal cortex, and fusiform gyri. The CG group also showed activation in the amygdala, hippocampus giri, thalamus, anterior insula, orbitofrontal cortices, middle frontal giri, supplementary motor area, anterior cingulate cortex, and right putamen. The NB group (but not CG group) showed significant deactivation of areas of the default mode network (i.e., medial prefrontal cortex and angular gyrus), the anterior cingulate cortex, and the superior temporal cortices extending to the posterior insula (see Table SM2).

**Table S2.** Brain regions showing significant activation or deactivation associated with the processing of death-related pictures.

| Brain region                    | CG  |     |     |                     |         | NB  |     |     |                     |         |
|---------------------------------|-----|-----|-----|---------------------|---------|-----|-----|-----|---------------------|---------|
|                                 | X   | Y   | Z   | kE                  | t value | X   | Y   | Z   | kE                  | t value |
| Death pictures > Fixation Cross |     |     |     |                     |         |     |     |     |                     |         |
| <i>Activations</i>              |     |     |     |                     |         |     |     |     |                     |         |
| Occipital lobe                  | 16  | -88 | -10 | 23 102 <sup>a</sup> | 7.91    | 22  | -92 | 6   | 23 112 <sup>a</sup> | 11.64   |
| Occipital lobe                  | -14 | -90 | -8  | 23 102 <sup>a</sup> | 7.53    | -40 | -82 | 0   | 23 112 <sup>a</sup> | 12.12   |
| Fusiform gyrus                  | -42 | -46 | -26 | 23 102 <sup>a</sup> | 8.87    | -36 | -38 | -24 | 23 112 <sup>a</sup> | 7.84    |
| Fusiform gyrus                  | 38  | -48 | -20 | 23 102 <sup>a</sup> | 8.66    | 34  | -44 | -20 | 23 112 <sup>a</sup> | 8.84    |
| Intraparietal Sulcus            |     |     |     |                     |         | -20 | -70 | 56  | 23 112 <sup>a</sup> | 5.23    |
| Intraparietal Sulcus            | 30  | -68 | 34  | 23 102 <sup>a</sup> | 4.48    | 22  | -72 | 52  | 23 112 <sup>a</sup> | 6.20    |
| Thalamus                        | 28  | -28 | -2  | 23 102 <sup>a</sup> | 5.62    |     |     |     |                     |         |
| Thalamus                        | -24 | -30 | 2   | 23 102 <sup>a</sup> | 4.78    |     |     |     |                     |         |
| Hippocampal gyrus               | -24 | -24 | -10 | 23 102 <sup>a</sup> | 6.77    |     |     |     |                     |         |
| Hippocampal gyrus               | 22  | -24 | -10 | 23 102 <sup>a</sup> | 6.52    |     |     |     |                     |         |
| Amygdala                        | -26 | 2   | -22 | 23 102 <sup>a</sup> | 6.70    |     |     |     |                     |         |
| Amygdala                        | 22  | -6  | -16 | 23 102 <sup>a</sup> | 5.57    |     |     |     |                     |         |
| Anterior Insula                 | -32 | 28  | 4   | 23 102 <sup>a</sup> | 4.03    |     |     |     |                     |         |
| Anterior Insula                 | 28  | 26  | -4  | 2 064 <sup>b</sup>  | 3.89    |     |     |     |                     |         |
| Orbitofrontal Cortex            | -38 | 26  | -16 | 23 102 <sup>a</sup> | 3.62    |     |     |     |                     |         |
| Orbitofrontal Cortex            | 32  | 30  | -16 | 2 064 <sup>b</sup>  | 5.88    |     |     |     |                     |         |

|                           |     |    |    |                     |      |
|---------------------------|-----|----|----|---------------------|------|
| Middle Frontal Gyrus      | -38 | 16 | 22 | 23 102 <sup>a</sup> | 4.80 |
| Middle Frontal Gyrus      | 40  | 10 | 30 | 2 064 <sup>b</sup>  | 5.66 |
| Putamen                   | 24  | 6  | 6  | 23 102 <sup>a</sup> | 4.20 |
| Supplementary Motor Area  | 12  | 6  | 68 | 420 <sup>c</sup>    | 3.96 |
| Anterior Cingulate Cortex | 10  | 16 | 44 | 420 <sup>c</sup>    | 4.70 |

Deactivations

|                           |     |     |    |                    |      |
|---------------------------|-----|-----|----|--------------------|------|
| Anterior Cingulate Cortex | 10  | 38  | 2  | 2 686 <sup>a</sup> | 5.63 |
| Medial Prefrontal Cortex  | 24  | 58  | 10 | 2 686 <sup>a</sup> | 5.36 |
| Superior Temporal Gyrus   | 58  | -22 | 8  | 1 447              | 5.04 |
| Superior Temporal Gyrus   | -46 | -12 | 4  | 394                | 4.64 |
| Angular Gyrus             | 48  | -56 | 38 | 574                | 5.56 |

Note. CG = complicated grief; NB = non-bereaved control group, x,y,z = peak MNI coordinates; kE = Cluster extent in voxels; <sup>a,b,c</sup>= part of the same cluster..

*Negative valence pictures > fixation cross*

Both groups showed significant activation of the visual cortex and the fusiform gyri while watching the negative valence pictures versus the fixation cross. The NB group also showed brain activation of the anterior part of the left middle frontal gyrus.

Both groups showed significant deactivation of areas of the default mode network (i.e., ventromedial prefrontal and posterior cingulate cortices, precuneus, and angular gyrus), while the NB group also showed deactivation of the right dorsolateral prefrontal cortex and temporal lobe (see Table SM3).

**Table S3.** Brain regions showing significant activation or deactivation associated with the processing of unpleasant/negative valence pictures.

| Brain region                   | CG  |      |     |                    |         | NB  |     |     |                     |         |
|--------------------------------|-----|------|-----|--------------------|---------|-----|-----|-----|---------------------|---------|
|                                | X   | Y    | Z   | kE                 | t value | X   | Y   | Z   | kE                  | t value |
| Negative > Fixation Cross      |     |      |     |                    |         |     |     |     |                     |         |
| <u>Activations</u>             |     |      |     |                    |         |     |     |     |                     |         |
| Occipital lobe                 | -20 | -100 | 12  | 8 347 <sup>a</sup> | 6.94    | -38 | -82 | 0   | 18 473 <sup>a</sup> | 12.65   |
| Occipital lobe                 | 14  | -90  | 6   | 8 347 <sup>a</sup> | 6.37    | 14  | -90 | -4  | 18 473 <sup>a</sup> | 13.16   |
| Fusiform gyrus                 | 36  | -50  | -18 | 8 347 <sup>a</sup> | 7.08    | 40  | -62 | -8  | 18 473 <sup>a</sup> | 10.82   |
| Fusiform gyrus                 | -36 | -52  | -12 | 8 347 <sup>a</sup> | 5.47    | -36 | -52 | -12 | 18 473 <sup>a</sup> | 9.43    |
| Middle Frontal Gyrus           |     |      |     |                    |         | -52 | 40  | 14  | 459                 | 5.15    |
| <u>Deactivations</u>           |     |      |     |                    |         |     |     |     |                     |         |
| Anterior Cingulate Cortex      | 0   | 30   | -2  | 512 <sup>a</sup>   | 4.51    | 10  | 36  | 18  | 7 575 <sup>a</sup>  | 5.29    |
| Medial Prefrontal Cortex       |     |      |     |                    |         | 8   | 42  | 2   | 7 575 <sup>a</sup>  | 5.78    |
| Posterior Cingulate /Precuneus | 2   | -26  | 30  | 696                | 4.32    | 10  | -66 | 38  | 4 577 <sup>b</sup>  | 8.38    |
| Dorsolateral Prefrontal Cortex |     |      |     |                    |         | 26  | 38  | 38  | 7 575 <sup>a</sup>  | 7.88    |
| Angular Gyrus                  | 64  | -52  | 36  | 512                | 5.82    | 46  | -58 | 46  | 2 297 <sup>a</sup>  | 7.79    |
| Angular Gyrus                  |     |      |     |                    |         | -50 | -60 | 46  | 1 023               | 6.27    |
| Temporal Lobe                  |     |      |     |                    |         | 42  | -4  | -20 | 2 079               | 5.72    |

Note. CG = complicated grief group; NB = non-bereaved control group x,y,z = peak MNI coordinates; kE = Cluster extent in voxels.

*Positive valence pictures > fixation cross*

Both groups showed significant activation of the occipital cortex and fusiform gyri during the viewing of positive pictures versus the fixation cross, with deactivation of the posterior cingulate cortex and precuneus. Specifically, the NB group showed deactivation of the anterior cingulate

cortex, medial and dorsolateral prefrontal cortices, superior and inferior temporal cortices, angular giri, and cerebellum (see Table SM4).

**Table S4.** Brain regions showing significant activation, deactivation, or between-group differences associated with the processing of pleasant/positive valence pictures.

| Brain region                   | CG  |      |     |                    |         | NB  |     |     |                     |         |
|--------------------------------|-----|------|-----|--------------------|---------|-----|-----|-----|---------------------|---------|
|                                | X   | Y    | Z   | kE                 | t value | X   | Y   | Z   | kE                  | t value |
| Positive > Fixation Cross      |     |      |     |                    |         |     |     |     |                     |         |
| <i>Activations</i>             |     |      |     |                    |         |     |     |     |                     |         |
| Occipital lobe                 | -20 | -100 | 12  | 7 959 <sup>a</sup> | 7.02    | -10 | -92 | -2  | 16 009 <sup>a</sup> | 11.12   |
| Occipital lobe                 | 26  | -90  | 8   | 7 959 <sup>a</sup> | 6.22    | 24  | -90 | 6   | 16 009 <sup>a</sup> | 11.57   |
| Fusiform gyrus                 | 36  | -52  | -20 | 7 959 <sup>a</sup> | 6.63    | 40  | -64 | -6  | 16 009 <sup>a</sup> | 8.63    |
| Fusiform gyrus                 | -36 | -52  | -14 | 7 959 <sup>a</sup> | 5.74    | -36 | -52 | -14 | 16 009 <sup>a</sup> | 8.77    |
| <i>Deactivations</i>           |     |      |     |                    |         |     |     |     |                     |         |
| Anterior Cingulate Cortex      |     |      |     |                    |         | 4   | 38  | 24  | 3 659 <sup>a</sup>  | 4.82    |
| Medial Prefrontal Cortex       |     |      |     |                    |         | 10  | 40  | 2   | 3 659 <sup>a</sup>  | 4.73    |
| Posterior Cingulate/Precuneus  | 4   | -32  | 46  | 1 054              | 4.98    | -8  | -66 | 36  | 5 343               | 7.82    |
| Superior Temporal Cortex       |     |      |     |                    |         | -48 | -14 | 6   | 1 177               | 5.15    |
| Superior Temporal Cortex       |     |      |     |                    |         | 60  | -30 | -4  | 1 376               | 6.50    |
| Inferior Temporal Cortex       |     |      |     |                    |         | 50  | -6  | -34 | 1 018               | 6.12    |
| Inferior Temporal Cortex       |     |      |     |                    |         | -50 | -8  | -36 | 389                 | 5.15    |
| Cerebellum                     |     |      |     |                    |         | -40 | -70 | -38 | 562                 | 5.66    |
| Angular Gyrus                  |     |      |     |                    |         | 50  | -56 | 40  | 1 955               | 8.16    |
| Angular Gyrus                  |     |      |     |                    |         | -48 | -62 | 44  | 1 882               | 7.21    |
| Dorsolateral Prefrontal Cortex |     |      |     |                    |         | -28 | 28  | 36  | 531                 | 5.18    |
| Dorsolateral Prefrontal Cortex |     |      |     |                    |         | 26  | 42  | 38  | 3 659 <sup>a</sup>  | 5.86    |

Note. CG = complicated grief group; NB = non-bereaved control group x,y,z = peak MNI coordinates; kE = Cluster extent in voxels.
